# Supplementary material
Source: PubMed Central journal article supplement (PMC2855915)
Supplement: 091784_1.pdf [file 091784_1.pdf]

**Appendix 1: Questions asked of participants aged 40 years and older with known risk factors for chronic obstructive pulmonary disease (COPD) who visited a primary care practitioner for any reason**

**Pre-spirometry interview about respiratory symptoms**

- Do you cough regularly?
- Do you cough up phlegm regularly?
- Do even simple chores make you short of breath?
- Do you wheeze when you exert yourself, or at night?
- Do you get frequent colds that persist longer than those of other people you know?

**Post-spirometry interview with participants who had spirometric evidence of COPD**

- Do you use oxygen? [If answer is yes, ask next question]
- How often do you use it? [choose only one answer]
  - All of the time
  - Only during the night
  - Only during the day
  - Only when I exercise
  - At night and when I exercise
- Has the doctor or other health care provider ever told you that you had:
  - Heart disease
  - Hypertension
  - Diabetes
  - Lung cancer
  - Stroke
  - Tuberculosis
